# Supplementary material
Source: publisher figshare collection journal article supplement (https://wiley.figshare.com/articles/dataset/_/3515270)
Supplement: Supplementary file 1 [file 1 › appendix-A.htm]

Ecological Archives A020-051-A1


### *Ecological Archives* A020-051-A1

### **James R. Thomson, Wim J. Kimmerer, Larry R. Brown, Ken B. Newman, Ralph Mac Nally, William A. Bennett, Frederick Feyrer, and Erica Fleishman. 2010. Bayesian change point analysis of abundance trends for pelagic fishes in the upper San Francisco Estuary. *Ecological Applications* 20:1431–1448.**

Appendix A. Details of prior distributions used in change point and associated regression models.

> View / download PDF.

---


[Back to A020-051]
